# Supplementary material
Source: Springer Nature journal article supplement (https://www.springermedizin.de/resource/supplementary/12961_2013_284_MOESM1_ESM.pdf/9570954)

# Mtengo, Paediatric

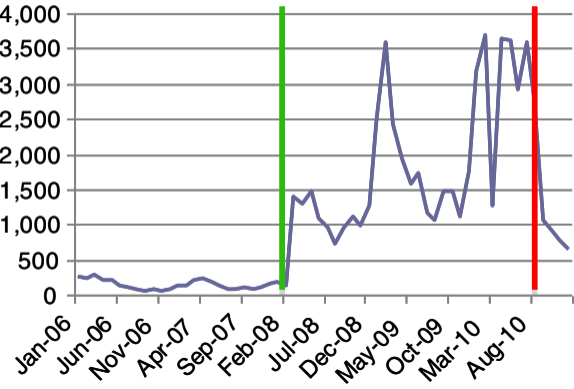

Supplement: MOESM1 [file 9570954]
